# Supplementary material for: Preparation and reactivity of rhodium and iridium complexes containing a methylborohydride based unit supported by two 7-azaindolyl heterocycles
Source: Royal Society of Chemistry journal article supplement (doi:10.1039/c8dt02311e), 2018-01-01
Supplement: c8dt02311e1.pdf [file c8dt02311e1.pdf]

# Electronic Supplementary Information (ESI) for: Preparation and Reactivity of Rhodium and Iridium Complexes Containing a Methylborohydride Based Unit Supported by Two 7-Azaindolyl Heterocycles,

Rosenildo Correa Da Costa, Ben W. Rawe, Nikolaos Tsoareas, Mairi F. Haddow, Hazel A. Sparkes, Graham J. Tizzard, Simon J. Coles and Gareth R. Owen,\*

## Contents

### A. Crystallographic Information for $\text{Li}(\text{MeCN})_2[\text{MeBai}]$ and Complexes **1**, **2**, **3** and **2a**.

1. Crystallographic parameters for  $\text{Li}(\text{MeCN})_2[\text{MeBai}]$  and Complexes **1**, **2**, **3** and **2a**.

### B. Selected Spectroscopy for the Ligand and Complexes

1. Spectra of ligand precursor  $\text{Li}(\text{NCMe})_2[\text{B}(\text{Me})\text{H}(\text{azaindolyl})_2]$ 
  - Figure 1.1 -  $^1\text{H}$  NMR spectrum
  - Figure 1.2 -  $^1\text{H}\{^{11}\text{B}\}$  NMR spectrum
  - Figure 1.3 -  $^{11}\text{B}$  NMR and  $^{11}\text{B}\{^1\text{H}\}$  spectra
  - Figure 1.4 -  $^{13}\text{C}\{^1\text{H}\}$  NMR spectrum
2. Spectra of complex  $[\text{Ir}\{\kappa^3\text{-}N,N,H\text{-B}(\text{Me})\text{H}(\text{azaindolyl})_2\}(\text{COD})]$  (**1**)
  - Figure 2.1 -  $^1\text{H}$  NMR spectrum
  - Figure 2.2 -  $^1\text{H}\{^{11}\text{B}\}$  NMR spectrum
  - Figure 2.3 -  $^{11}\text{B}$  NMR and  $^{11}\text{B}\{^1\text{H}\}$  spectra
  - Figure 2.4 -  $^{13}\text{C}\{^1\text{H}\}$  NMR spectrum
3. Spectra of complex  $[\text{Rh}\{\kappa^3\text{-}N,N,H\text{-B}(\text{Me})\text{H}(\text{azaindolyl})_2\}(\text{COD})]$  (**2**)
  - Figure 3.1 -  $^1\text{H}$  NMR spectrum
  - Figure 3.2 -  $^1\text{H}\{^{11}\text{B}\}$  NMR spectrum
  - Figure 3.3 -  $^{11}\text{B}$  and  $^{11}\text{B}\{^1\text{H}\}$  NMR spectra
  - Figure 3.4 -  $^{13}\text{C}\{^1\text{H}\}$  NMR spectrum
4. Spectra of complex  $[\text{Rh}\{\kappa^3\text{-}N,N,H\text{-B}(\text{Me})\text{H}(\text{azaindolyl})_2\}(\text{COD}^{\text{Me}})]$  (**2-Me**)
  - Figure 4.1 -  $^1\text{H}$  NMR spectrum
  - Figure 4.2 -  $^1\text{H}\{^{11}\text{B}\}$  NMR spectrum
  - Figure 4.3 -  $^{11}\text{B}$  and  $^{11}\text{B}\{^1\text{H}\}$  NMR spectra
  - Figure 4.4 -  $^{13}\text{C}\{^1\text{H}\}$  NMR spectrum
5. Spectra of complex  $[\text{Rh}\{\kappa^3\text{-}N,N,H\text{-B}(\text{Me})\text{H}(\text{azaindolyl})_2\}(\text{NBD})]$  (**3**)
  - Figure 5.1 -  $^1\text{H}$  NMR spectrum
  - Figure 5.2 -  $^1\text{H}\{^{11}\text{B}\}$  NMR spectrum
  - Figure 5.3 -  $^{11}\text{B}$  and  $^{11}\text{B}\{^1\text{H}\}$  NMR spectra
  - Figure 5.4 -  $^{13}\text{C}\{^1\text{H}\}$  NMR spectrum
6. Activation studies of complex  $[\text{Rh}\{\kappa^3\text{-}N,N,H\text{-B}(\text{Me})\text{H}(\text{azaindolyl})_2\}(\text{COD})]$  (**2**) to form **2a**
  - Figure 6.1 -  $^{11}\text{B}$  NMR and  $^{11}\text{B}\{^1\text{H}\}$  spectra in  $\text{C}_6\text{D}_6$  (mixture of **2** and **2a**)
  - Figure 6.2 -  $^{11}\text{B}$  NMR and  $^{11}\text{B}\{^1\text{H}\}$  NMR spectra in  $\text{CD}_2\text{Cl}_2$  (mixture of **2** and **2a**)
  - Figure 6.3 -  $^1\text{H}$  NMR spectrum (mixture of **2** and **2a**)
  - Figure 6.4 - Partial  $^1\text{H}\{^{11}\text{B}\}$  NMR spectrum (mixture of **2** and **2a**)
  - Figure 6.5 -  $^{11}\text{B}$  NMR and  $^{11}\text{B}\{^1\text{H}\}$  NMR spectra (activated product **2a** – after crystallisation)
  - Figure 6.6 -  $^1\text{H}$  NMR spectrum (activated product **2a** – after crystallisation)
  - Figure 6.7 -  $^{13}\text{C}\{^1\text{H}\}$  NMR spectrum (activated product **2a** – after crystallisation)
  - Figure 6.8 - Comparison of infrared of starting complex **2** and product with **2a**

A. Crystallographic Information for Li<sup>[Me]Bai</sup> and Complexes 1, 2, 3 and 2a.

1. Crystallographic parameters for Li<sup>[Me]Bai</sup> and Complexes 1, 2, 3 and 2a.

| Complex                                        | Li(NCMe) <sub>2</sub> [ <sup>Me</sup> Bai]        | 1                                                  | 2                                                  | 3                                                  | 2a                                                 |
|------------------------------------------------|---------------------------------------------------|----------------------------------------------------|----------------------------------------------------|----------------------------------------------------|----------------------------------------------------|
| Formula                                        | C <sub>19</sub> H <sub>20</sub> BLiN <sub>6</sub> | C <sub>23</sub> H <sub>26</sub> BN <sub>4</sub> Ir | C <sub>23</sub> H <sub>26</sub> BN <sub>4</sub> Rh | C <sub>22</sub> H <sub>22</sub> BN <sub>4</sub> Rh | C <sub>23</sub> H <sub>26</sub> BN <sub>4</sub> Rh |
| <i>D</i> <sub>calc.</sub> / g cm <sup>-3</sup> | 1.228                                             | 1.781                                              | 1.502                                              | 1.604                                              | 1.553                                              |
| $\mu$ /mm <sup>-1</sup>                        | 0.076                                             | 6.393                                              | 0.834                                              | 0.919                                              | 0.863                                              |
| Formula Weight                                 | 350.16                                            | 561.49                                             | 472.20                                             | 456.15                                             | 472.20                                             |
| Colour                                         | colourless                                        | yellow                                             | yellow                                             | yellow                                             | colourless                                         |
| Size/mm <sup>3</sup>                           | 0.49 × 0.36 × 0.12                                | 0.05 × 0.05 × 0.04                                 | 0.18 × 0.12 × 0.05                                 | 0.50 × 0.10 × 0.10                                 | 0.10×0.09×0.08                                     |
| <i>T</i> /K                                    | 100(2)                                            | 100(2)                                             | 100(2)                                             | 100(2)                                             | 100(2)                                             |
| Crystal System                                 | monoclinic                                        | trigonal                                           | triclinic                                          | monoclinic                                         | monoclinic                                         |
| Space Group                                    | P2 <sub>1</sub> /n                                | R-3                                                | P-1                                                | C2/c                                               | P2 <sub>1</sub> /n                                 |
| <i>a</i> /Å                                    | 8.3408(4)                                         | 26.9680(16)                                        | 14.9965(3)                                         | 22.5002(3)                                         | 14.5731(3)                                         |
| <i>b</i> /Å                                    | 15.0529(6)                                        | 26.9680(16)                                        | 16.0602(3)                                         | 10.5702(2)                                         | 16.5975(4)                                         |
| <i>c</i> /Å                                    | 15.1212(6)                                        | 14.961(2)                                          | 16.3753(5)                                         | 15.9172(2)                                         | 17.2681(3)                                         |
| $\alpha$ /°                                    | 90                                                | 90                                                 | 111.4750(10)                                       | 90                                                 | 90                                                 |
| $\beta$ /°                                     | 94.024(2)                                         | 90                                                 | 107.6280(10)                                       | 93.7480(10)                                        | 104.767(2)                                         |
| $\gamma$ /°                                    | 90                                                | 120                                                | 106.4890(10)                                       | 90                                                 | 90                                                 |
| <i>V</i> /Å <sup>3</sup>                       | 1893.84(14)                                       | 9423.2(18)                                         | 3132.31(13)                                        | 3777.52(10)                                        | 4038.80(15)                                        |
| <i>Z</i>                                       | 4                                                 | 18                                                 | 6                                                  | 8                                                  | 8                                                  |
| <i>Z'</i>                                      | 1                                                 | 1                                                  | 3                                                  | 1                                                  | 2                                                  |
| Wavelength/Å                                   | 0.71073                                           | 0.71073                                            | 0.71073                                            | 0.71073                                            | 0.71075                                            |
| Radiation type                                 | MoK $\alpha$                                      | MoK $\alpha$                                       | MoK $\alpha$                                       | MoK $\alpha$                                       | MoK $\alpha$                                       |
| $\theta$ <sub>min</sub> /°                     | 1.911                                             | 2.212                                              | 1.52                                               | 3.628                                              | 2.440                                              |
| $\theta$ <sub>max</sub> /°                     | 27.44498                                          | 25.342                                             | 27.531                                             | 55.106                                             | 27.483                                             |
| Measured Refl.                                 | 17411                                             | 18758                                              | 87639                                              | 32574                                              | 46283                                              |
| Independent Refl.                              | 4351                                              | 3824                                               | 14384                                              | 4364                                               | 9257                                               |
| <i>R</i> <sub>int</sub>                        | 0.0305                                            | 0.1040                                             | 0.0327                                             | 0.0189                                             | 0.0773                                             |
| Parameters                                     | 250                                               | 263                                                | 787                                                | 257                                                | 532                                                |
| Restraints                                     | 0                                                 | 0                                                  | 0                                                  | 0                                                  | 0                                                  |
| Largest Peak                                   | 0.29                                              | 2.59                                               | 1.40                                               | 1.22                                               | 2.043                                              |
| Deepest Hole                                   | -0.21                                             | -2.89                                              | -0.80                                              | -0.40                                              | -1.404                                             |
| GooF                                           | 1.045                                             | 1.129                                              | 1.064                                              | 1.032                                              | 1.043                                              |
| <i>wR</i> <sub>2</sub> (all data)              | 0.0984                                            | 0.1283                                             | 0.0743                                             | 0.0544                                             | 0.1559                                             |
| <i>wR</i> <sub>2</sub>                         | 0.0930                                            | 0.1165                                             | 0.0701                                             | 0.0531                                             | 0.1407                                             |
| <i>R</i> <sub>1</sub> (all data)               | 0.0455                                            | 0.1018                                             | 0.0362                                             | 0.0223                                             | 0.0771                                             |
| <i>R</i> <sub>1</sub>                          | 0.0375                                            | 0.0661                                             | 0.0286                                             | 0.0207                                             | 0.0571                                             |
| CCDC Dep. No.                                  | 1847347                                           | 1847348                                            | 1847349                                            | 1847350                                            | 1847138                                            |

## B. Selected Spectroscopy for the Ligand and Complexes

### 1. Spectra for $\text{Li}(\text{NCMe})_2[\text{B}(\text{Me})\text{H}(\text{azaindoly})_2]$

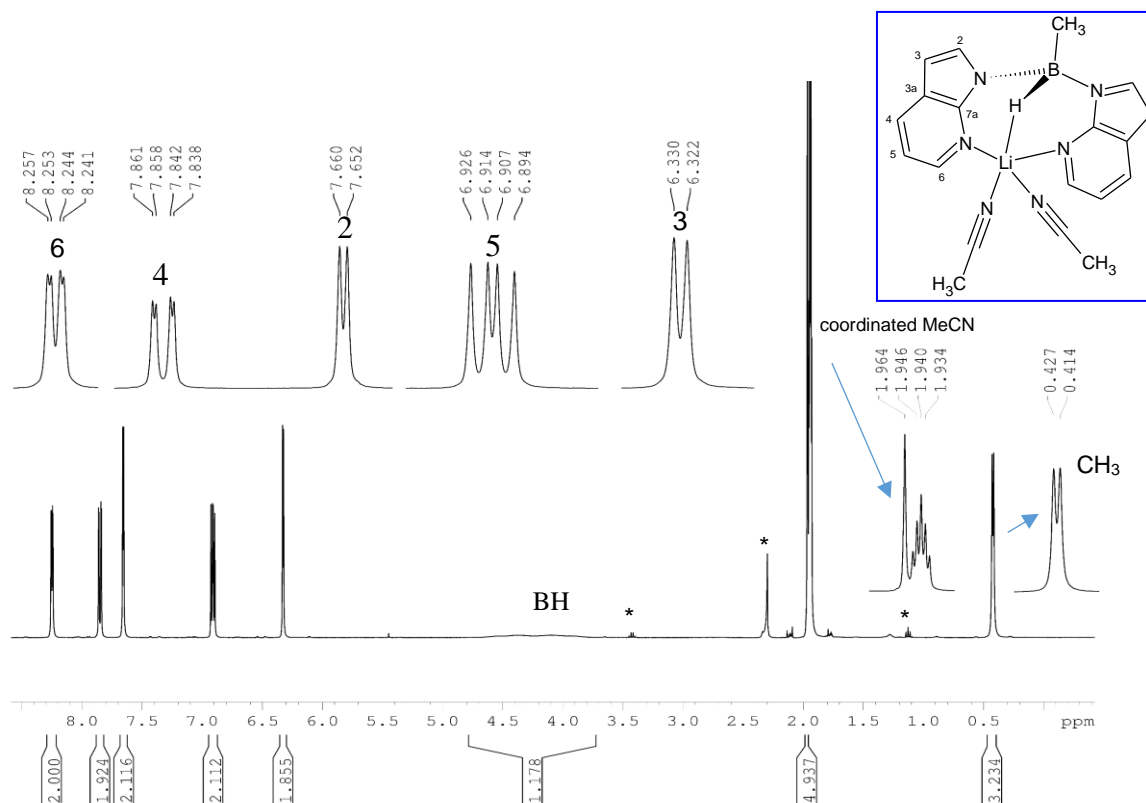

Figure 1.1:  $^1\text{H}$  NMR (CD<sub>3</sub>CN), 400.13 MHz, 298 K (\* = residual solvent)

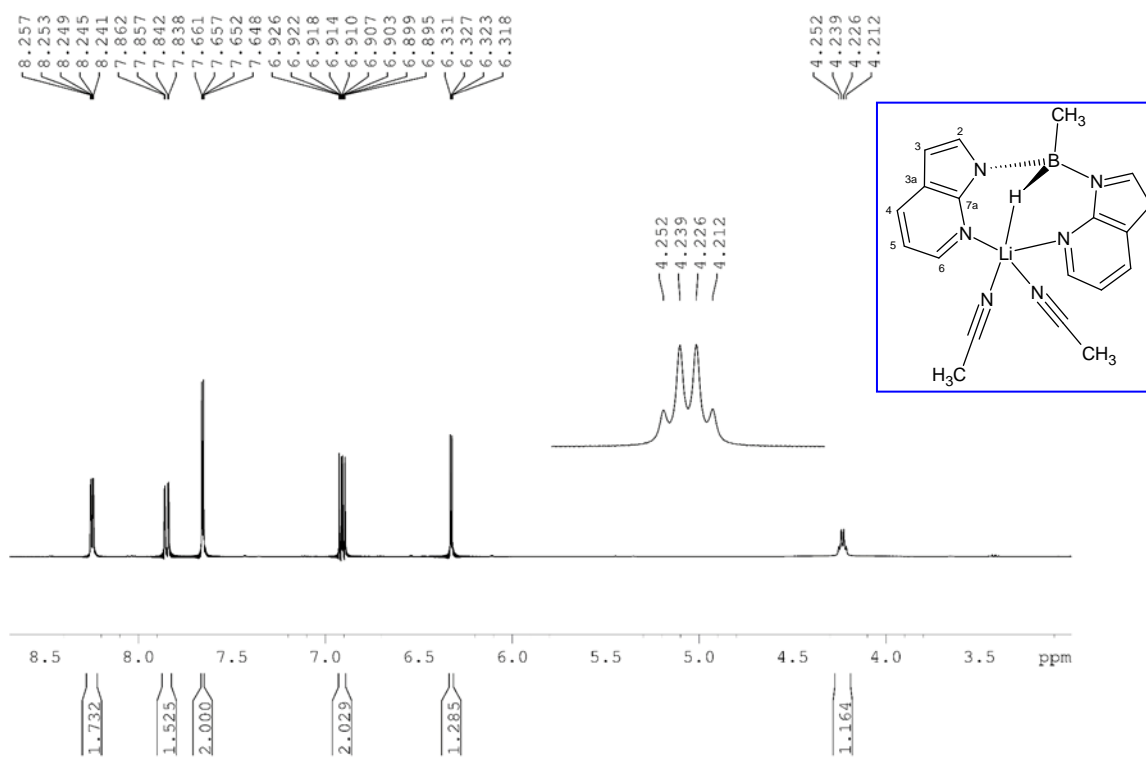

Figure 1.2: Partial  $^1\text{H}\{^{11}\text{B}\}$  NMR (CD<sub>3</sub>CN), 400.13 MHz, 298 K highlighting the BH unit

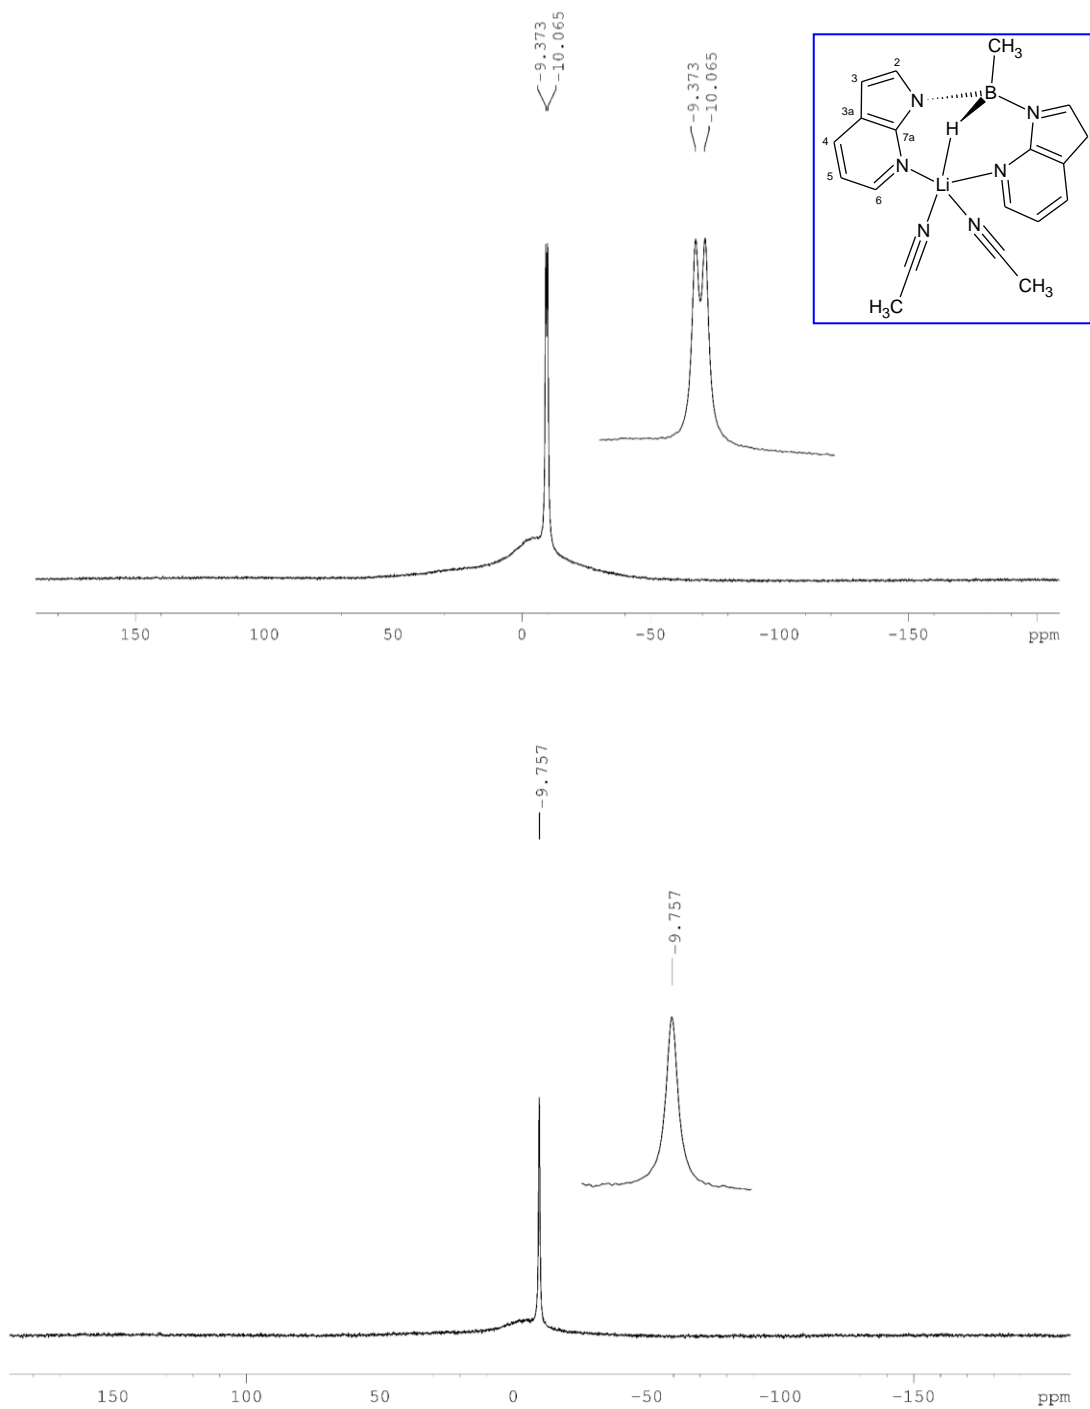

Figure 1.3: <sup>11</sup>B NMR (top) and <sup>11</sup>B{<sup>1</sup>H} (bottom) in CD<sub>3</sub>CN, 128.37 MHz, 298 K

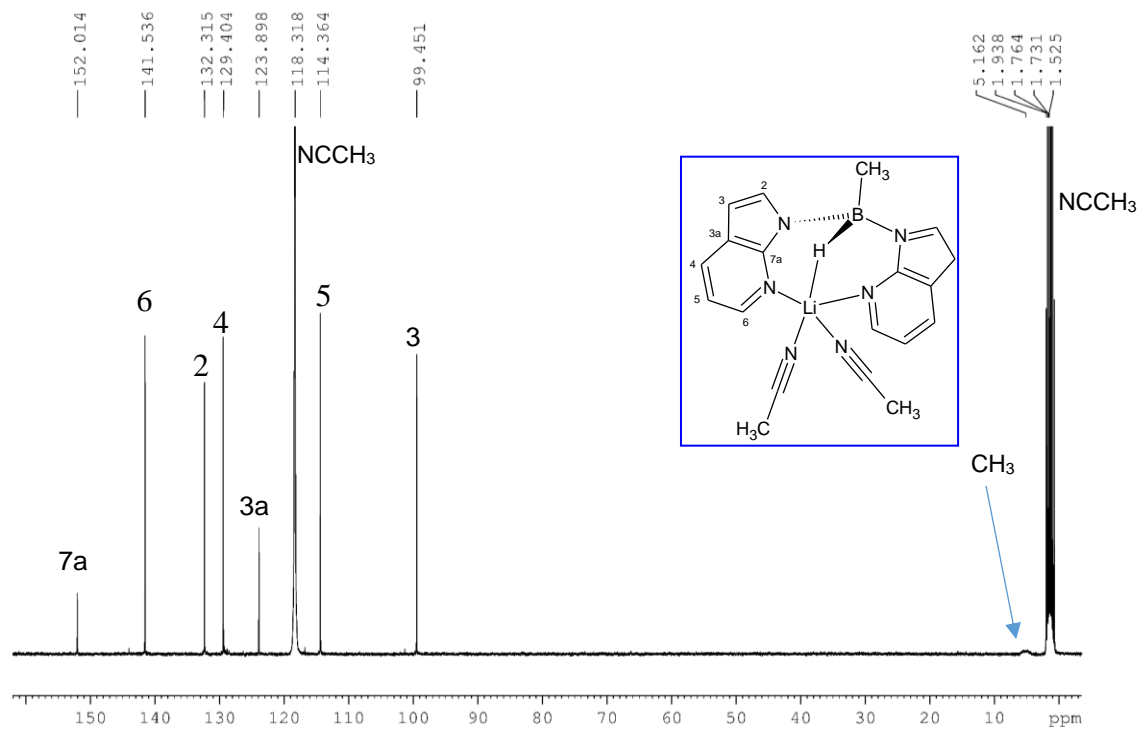

## 2. Spectra of complex $[\text{Ir}\{\kappa^3\text{-}N,N,H\text{-B}(\text{Me})\text{H}(\text{azaindoly})_2\}(\text{COD})]$ (1)

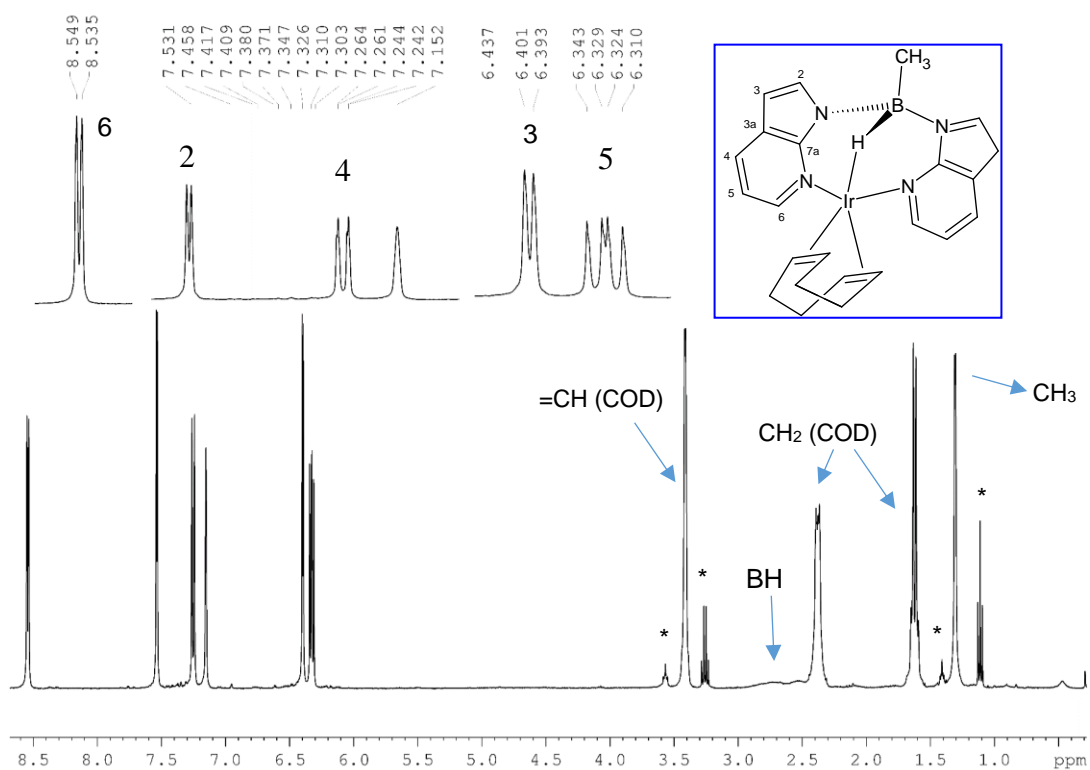

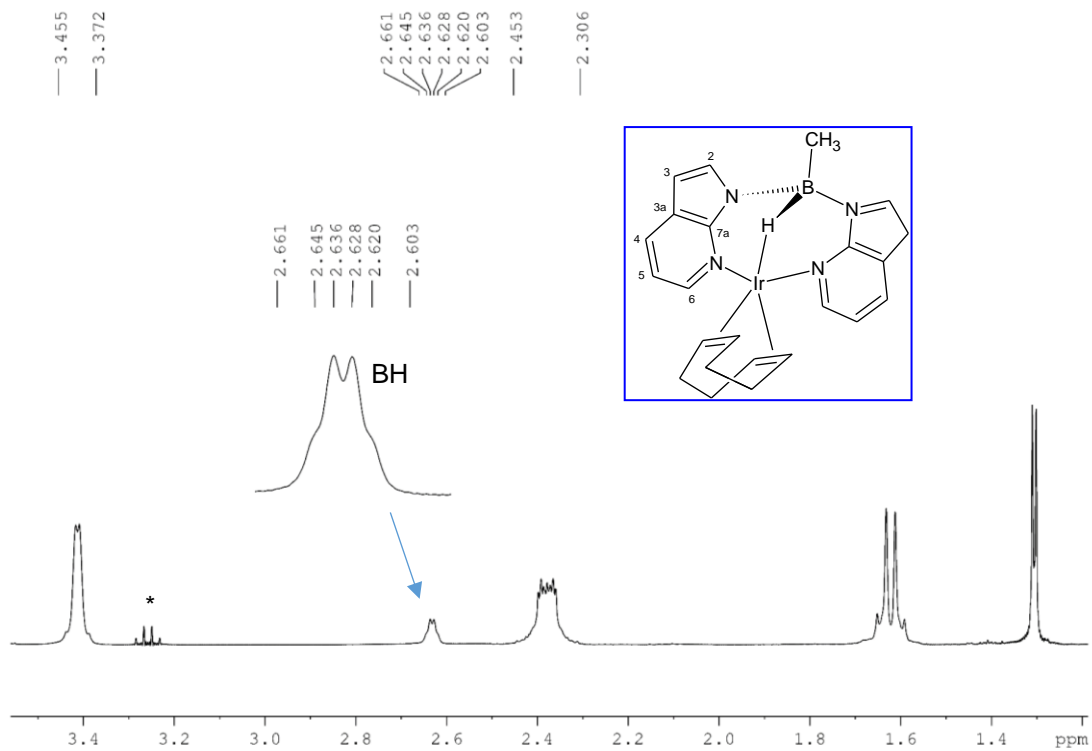

Figure 2.2: Partial  $^1\text{H}\{^{11}\text{B}\}$  NMR ( $\text{C}_6\text{D}_6$ ), 400.13 MHz, 298 K (\* = residual solvent)

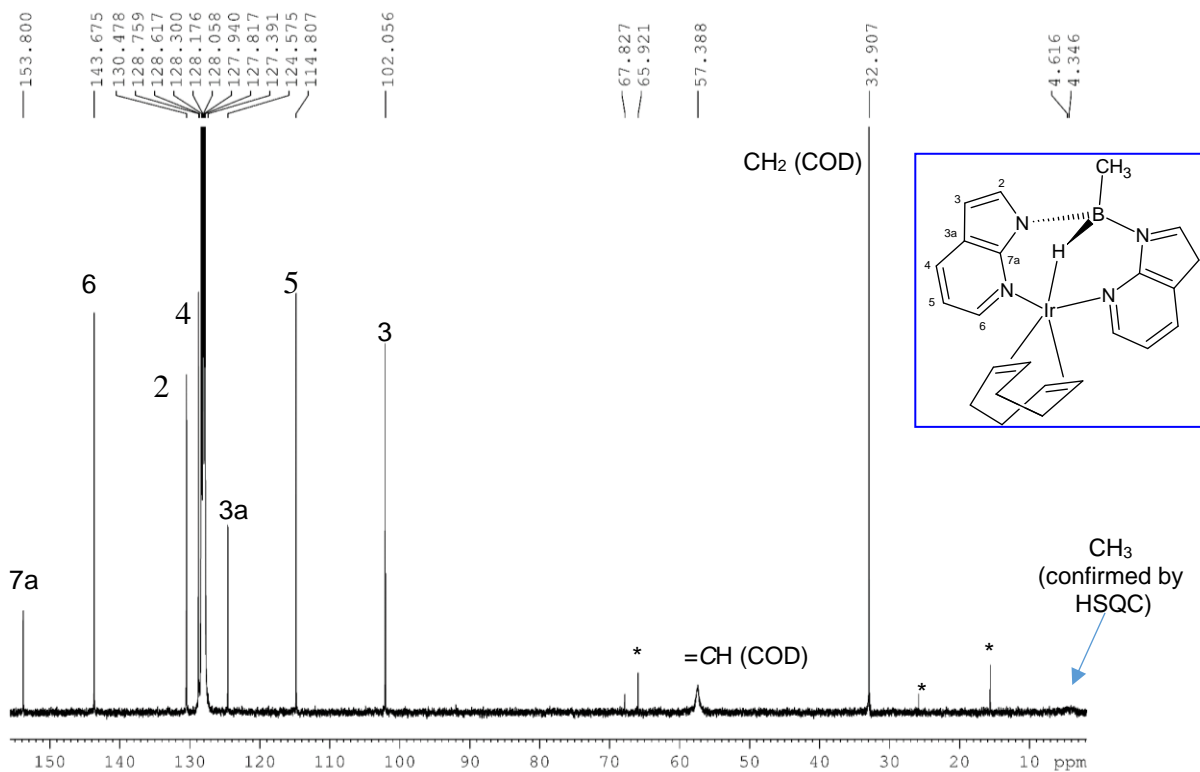

Figure 2.3:  $^{13}\text{C}\{^1\text{H}\}$  NMR ( $\text{C}_6\text{D}_6$ ), 100.62 MHz, 298 K (\* = residual solvent)

### 3. Spectra of complex $[Rh\{\kappa^3-N,N,H-B(Me)H(azaindoly)_2\}(COD)]$ (2)

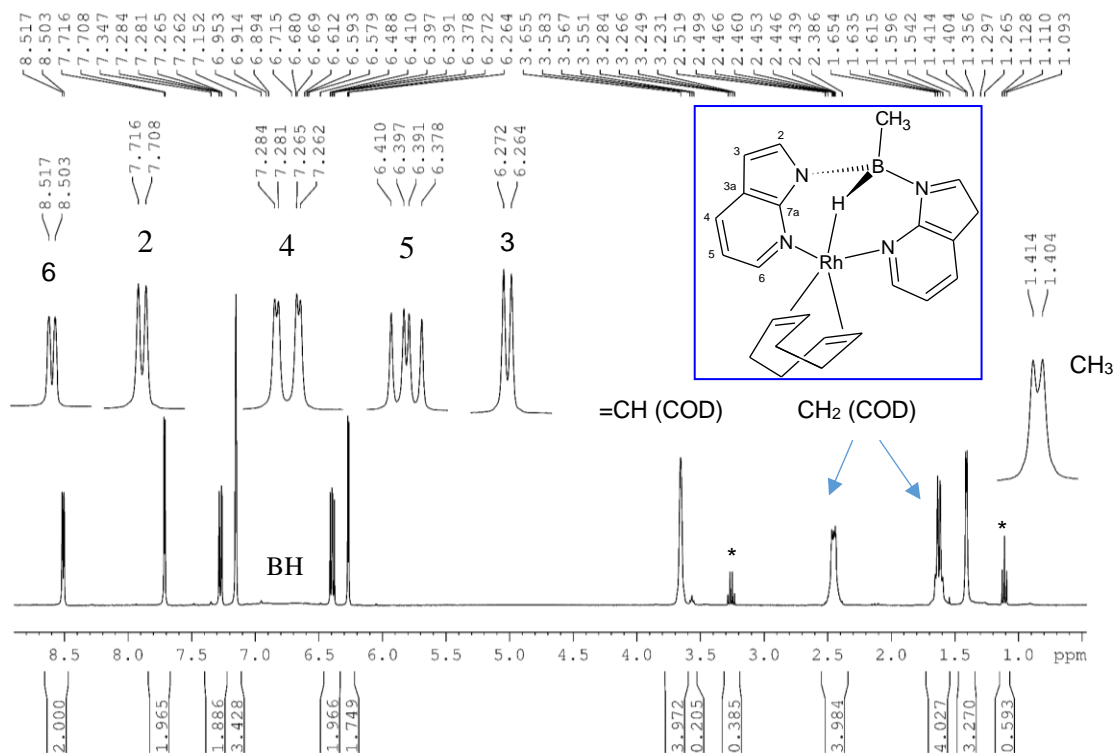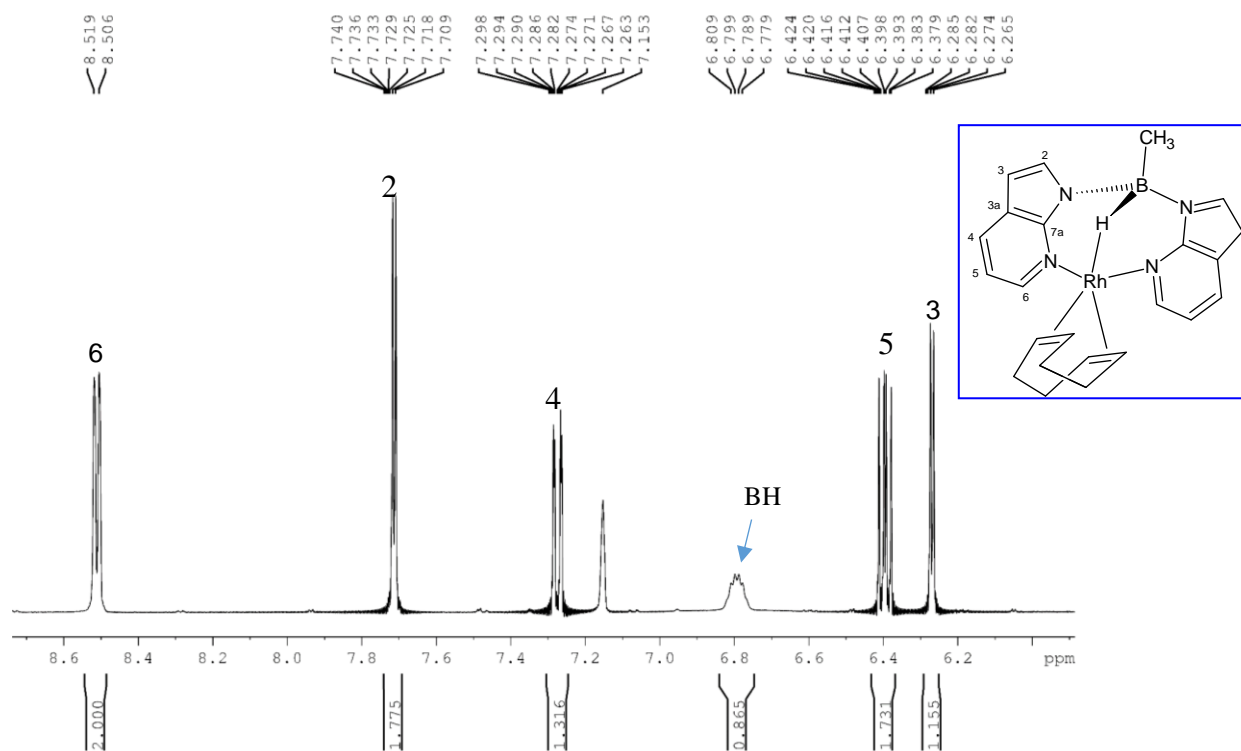

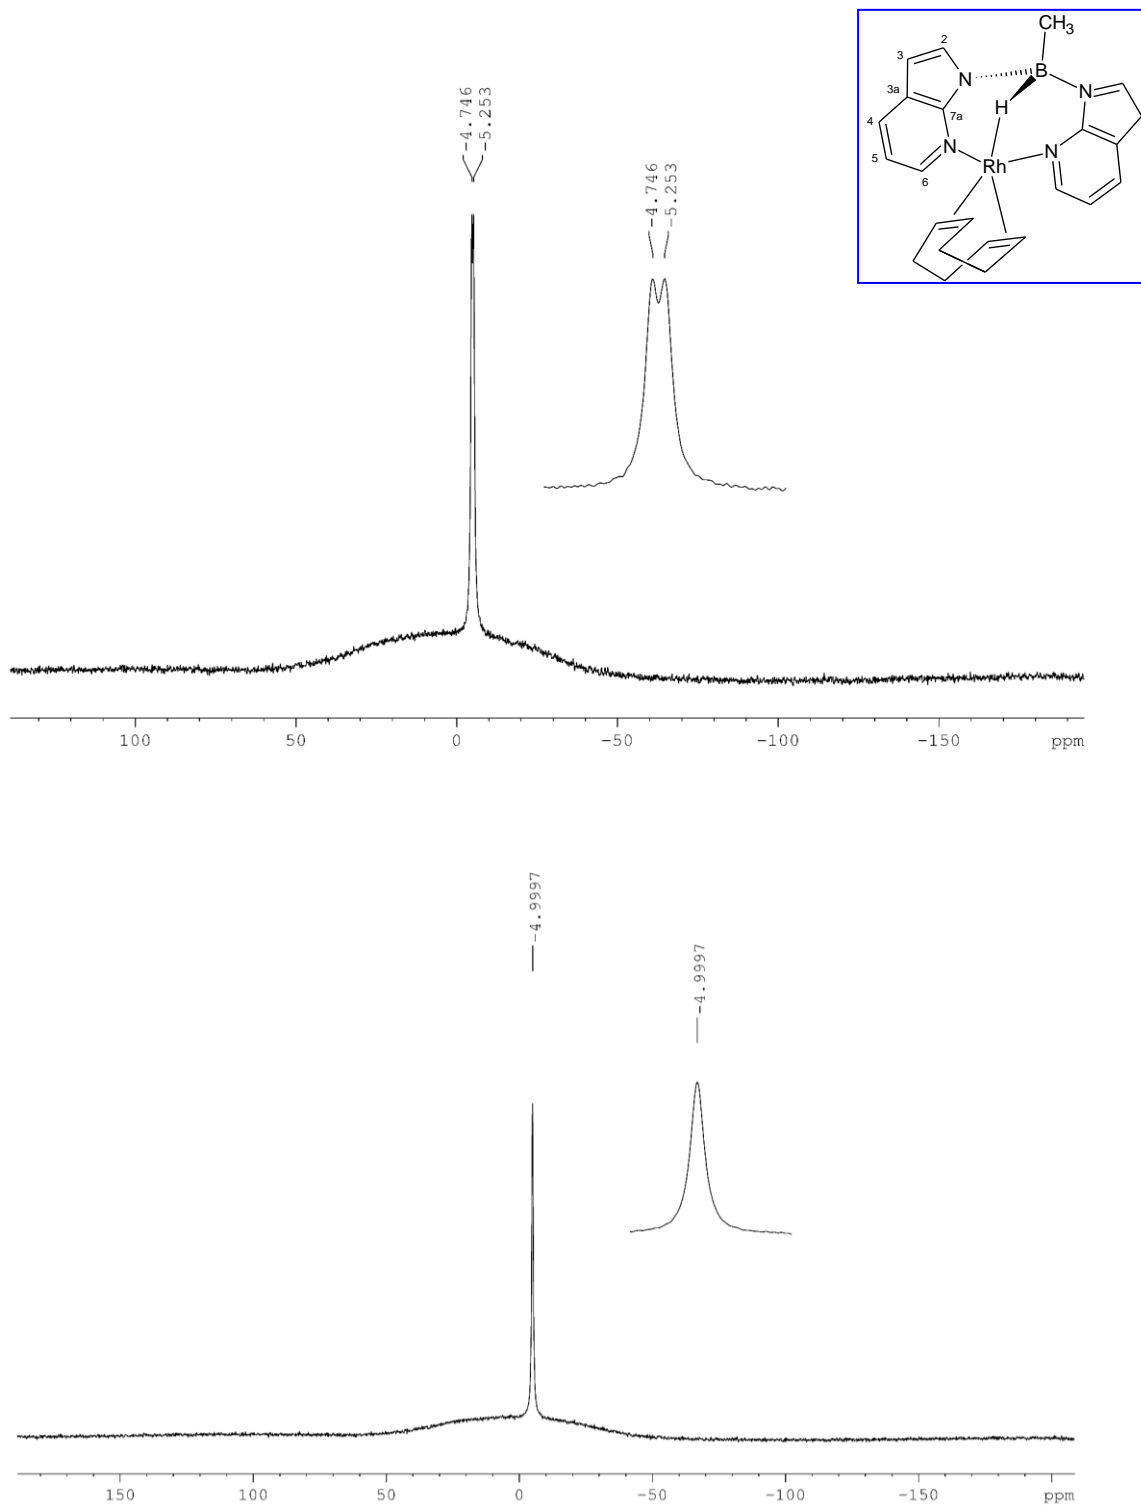

Figure 3.3:  $^{11}\text{B}$  NMR (top) and  $^{11}\text{B}\{^1\text{H}\}$  (bottom) NMR,  $\text{C}_6\text{D}_6$ , 128.37 MHz, 298 K [ $\text{Rh}\{\kappa^3\text{-}N,N,H\text{-B(Me)H}(\text{azaindoly})_2\}(\text{COD})$ ] (**2**)



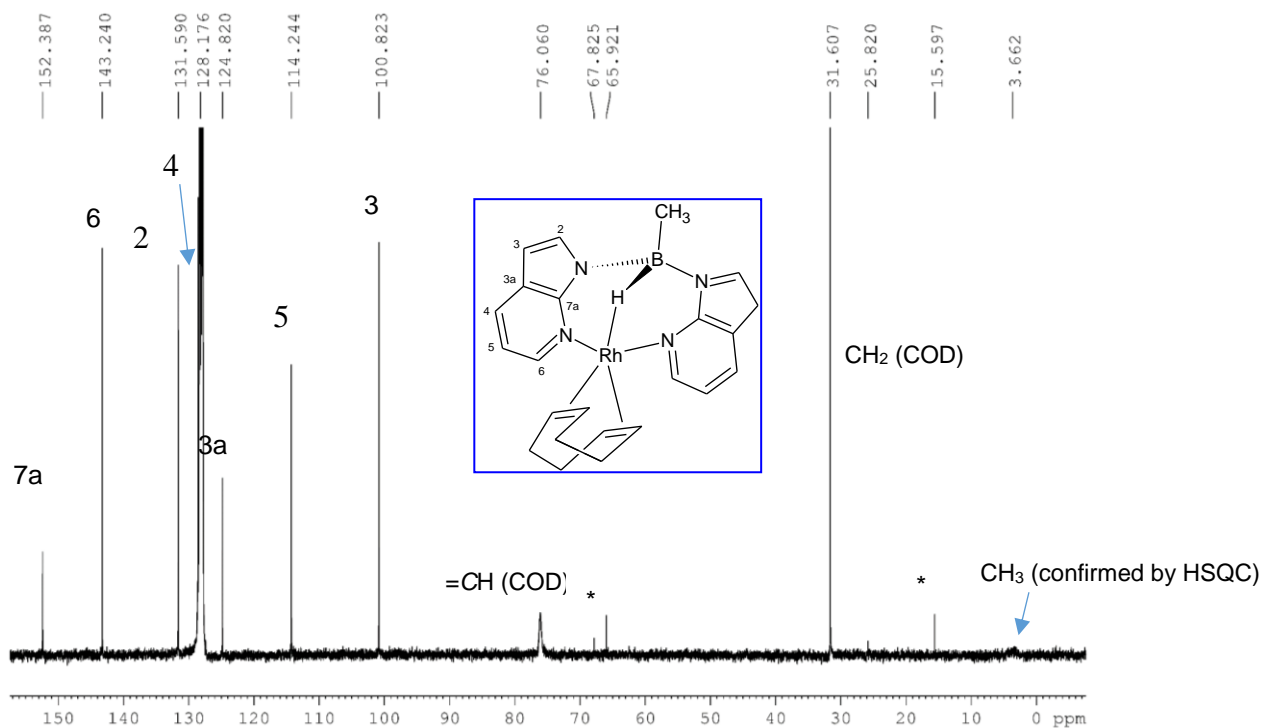

#### 4. Spectra of complex $[\text{Rh}\{\kappa^3\text{-}N,N,H\text{-B(Me)H}(\text{azaindoly})_2\}(\text{COD}^{\text{Me}})]$ (2-Me)

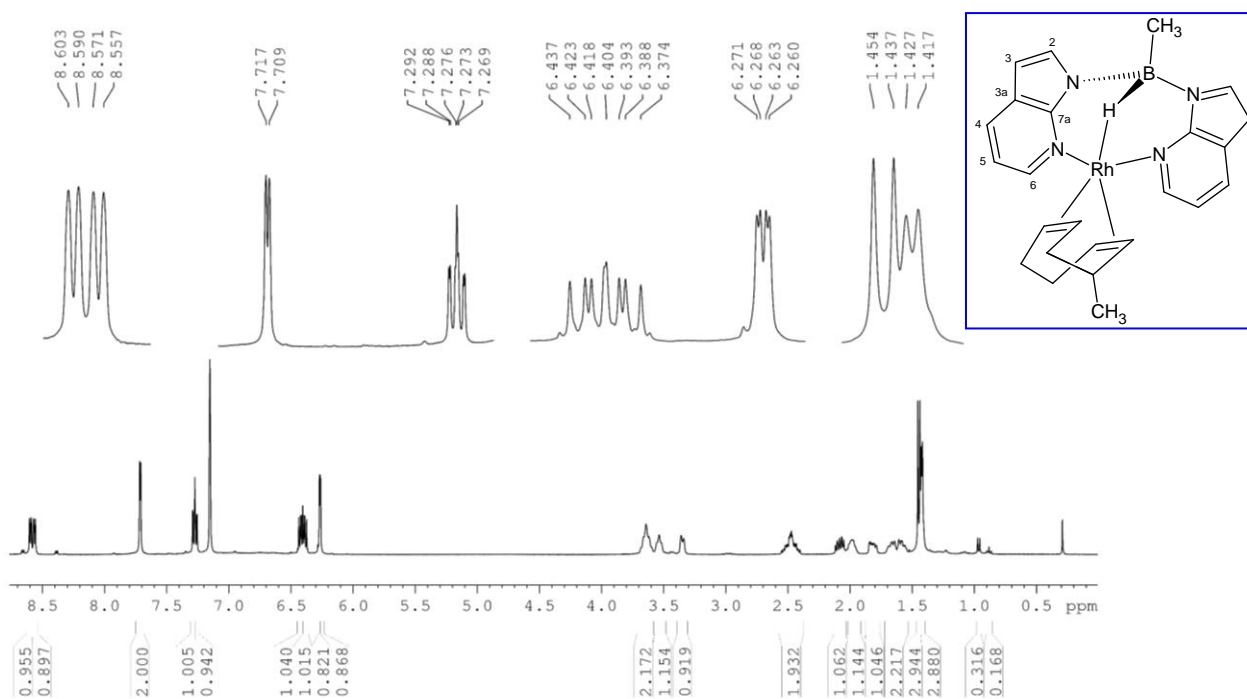

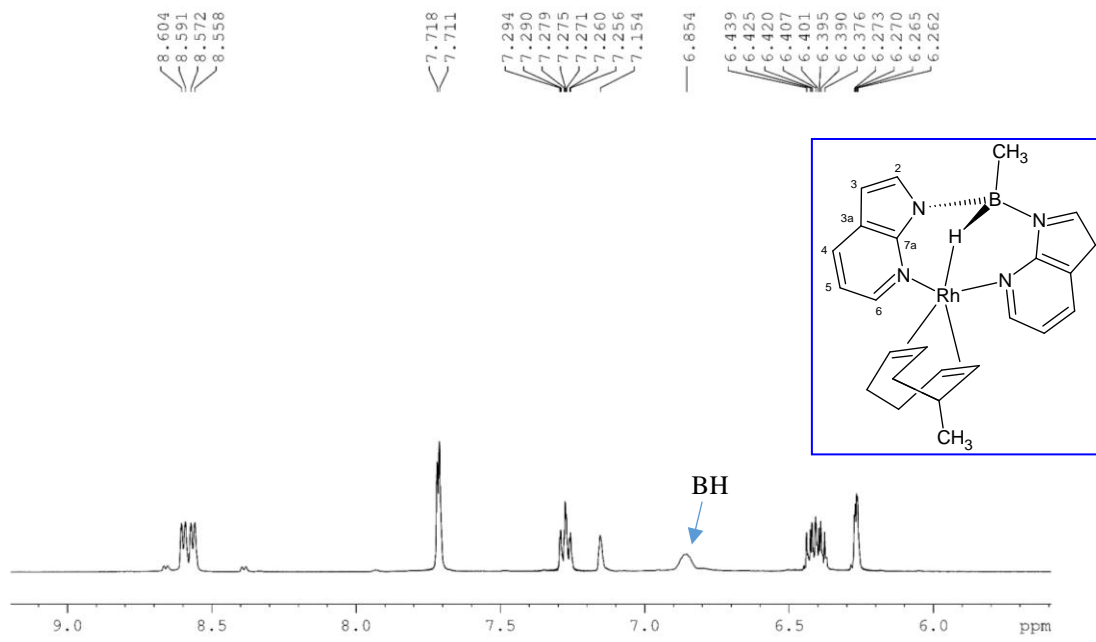

Figure 4.2: Partial  $^1\text{H}\{^{11}\text{B}\}$  NMR,  $\text{C}_6\text{D}_6$ , 400.13 MHz, 298 K

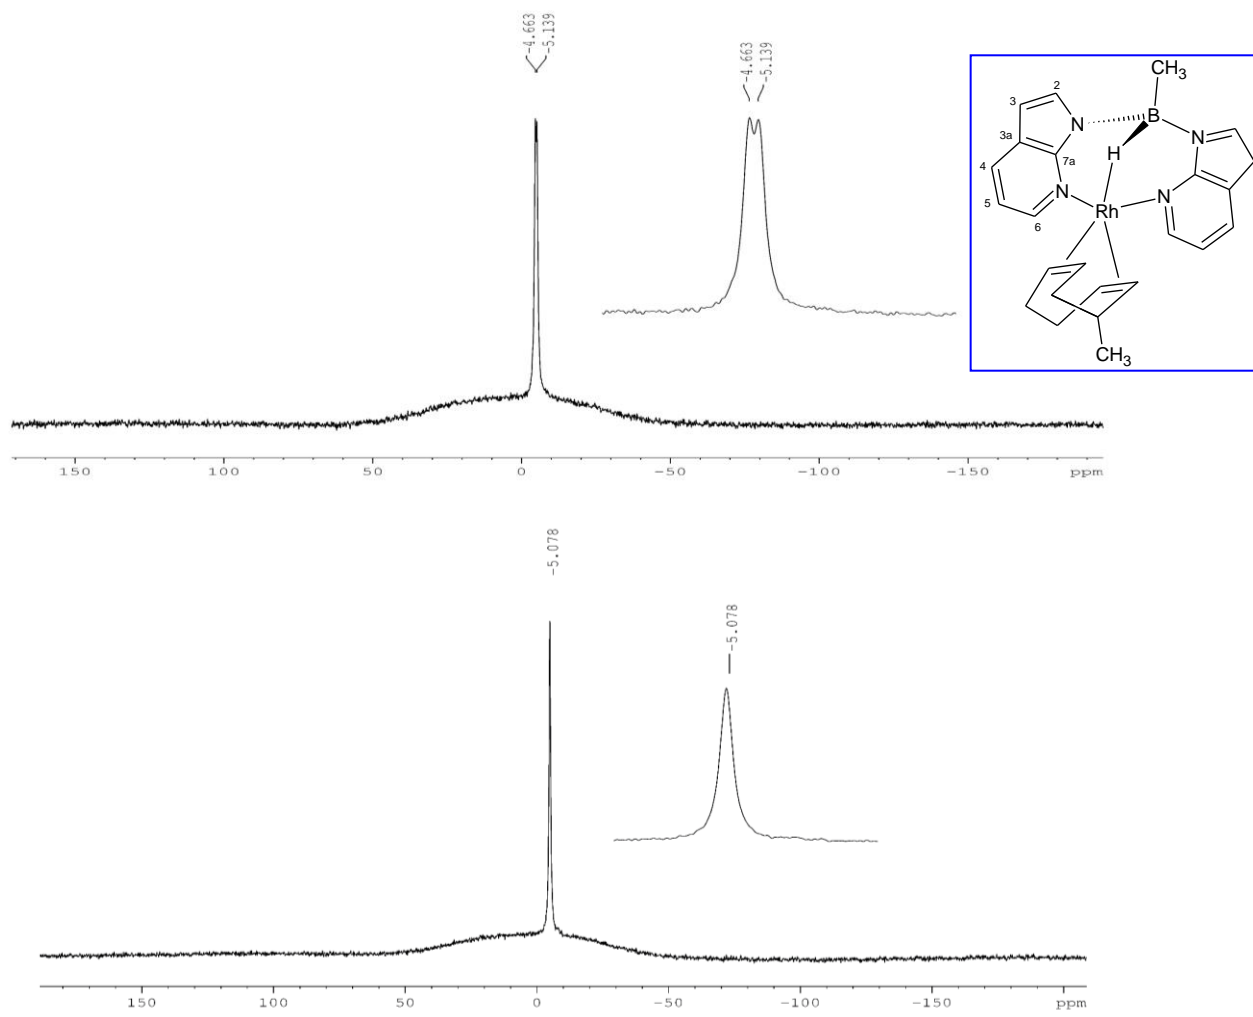

Figure 4.3:  $^{11}\text{B}$  NMR (top) and  $^{11}\text{B}\{^1\text{H}\}$  (bottom) NMR,  $\text{C}_6\text{D}_6$ , 128.37 MHz, 298 K [ $\text{Rh}\{\kappa^3\text{-}N,N,H\text{-}B(\text{Me})\text{H}(\text{azaindoly})_2\}(\text{COD})\}$ ] (**2-Me**)

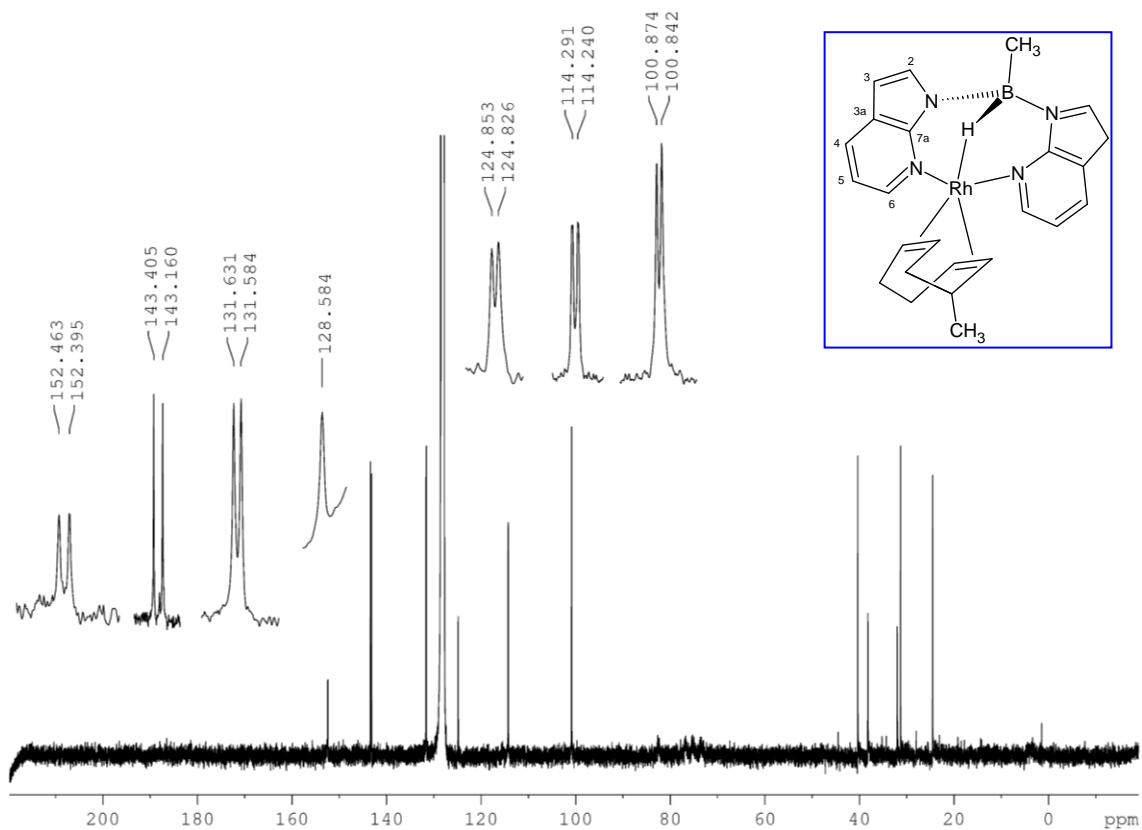

Figure 4.4:  $^{13}\text{C}\{^1\text{H}\}$  NMR ( $\text{C}_6\text{D}_6$ ), 100.62 MHz, 298 K

5. Spectra of complex  $[\text{Rh}\{\kappa^3\text{-}N,N,H\text{-B}(\text{Me})\text{H}(\text{azaindoly})_2\}(\text{NBD})]$  (3)

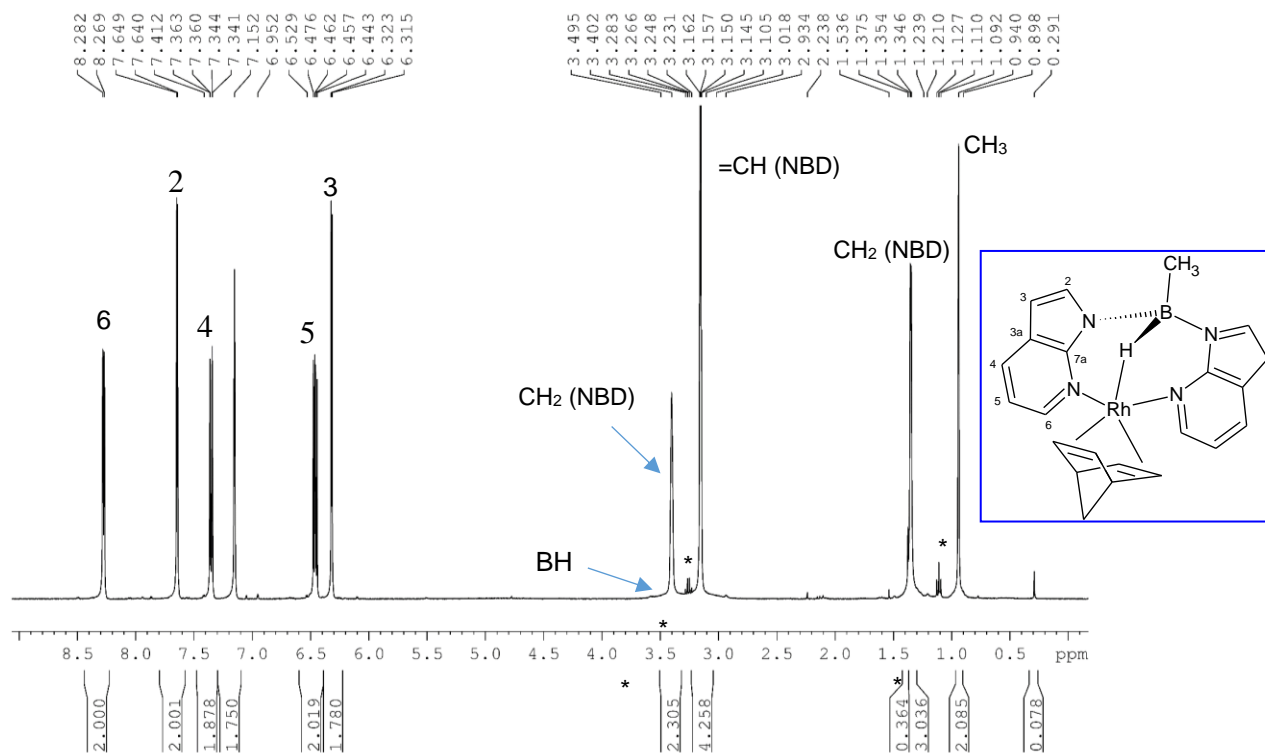

Figure 5.1:  $^1\text{H}$  NMR ( $\text{C}_6\text{D}_6$ ), 400.13 MHz, 298 K (\* = residual solvent)

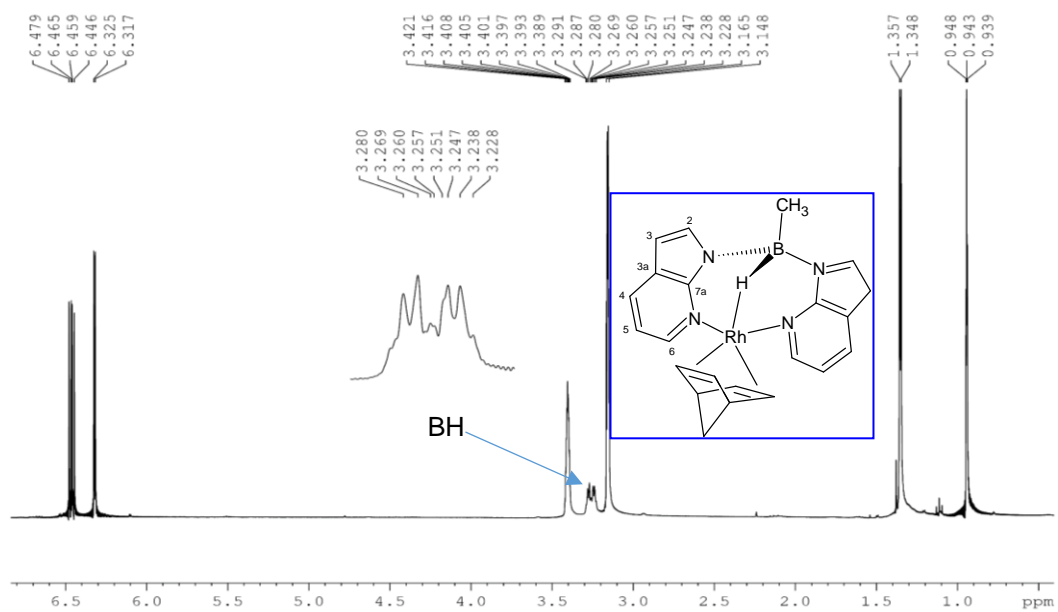

Figure 5.2: Partial  $^1\text{H}\{^{11}\text{B}\}$  NMR ( $\text{C}_6\text{D}_6$ ), 400.13 MHz, 298 K (\* = residual solvent)

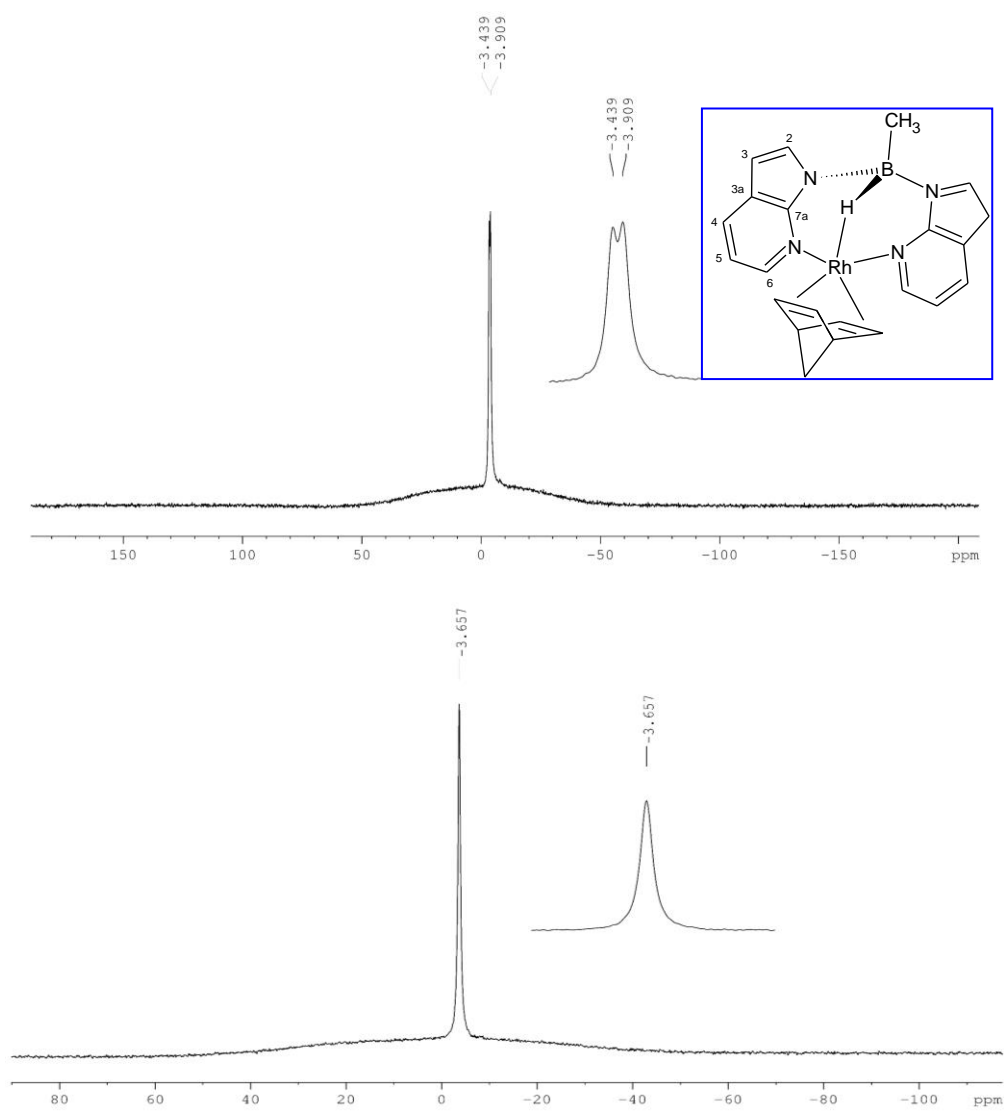

Figure 5.3:  $^{11}\text{B}$  NMR (top) and  $^{11}\text{B}\{^1\text{H}\}$  (bottom) in  $\text{CD}_3\text{CN}$ , 128.37 MHz, 298 K

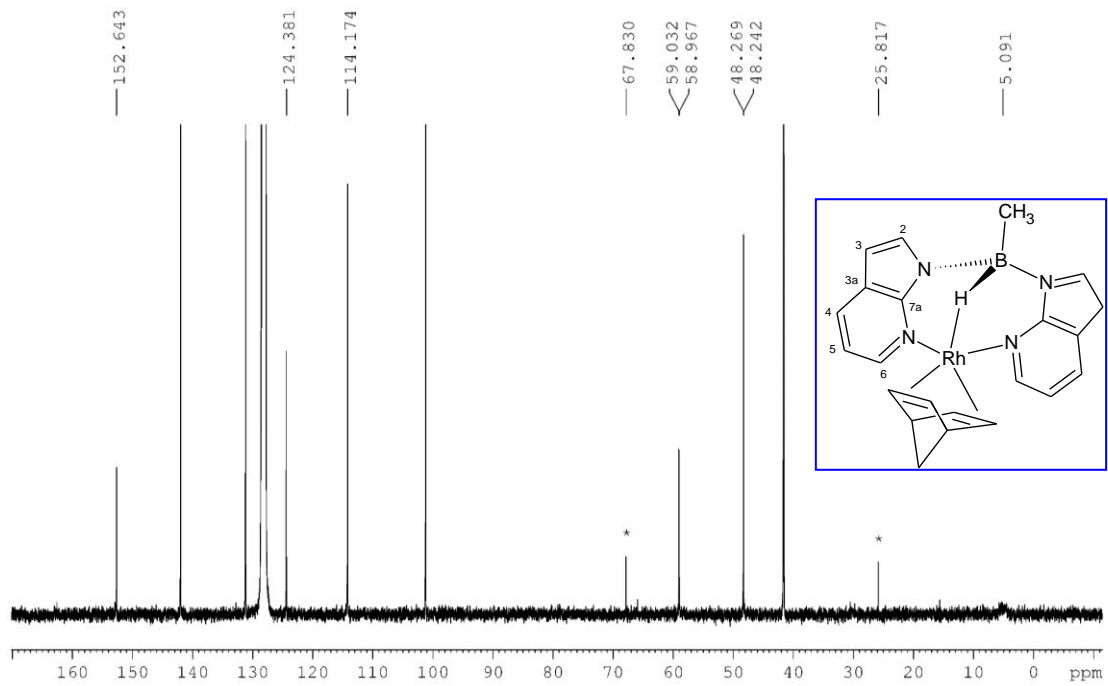

Figure 5.4:  $^{13}\text{C}\{^1\text{H}\}$  NMR ( $\text{C}_6\text{D}_6$ ), 100.62 MHz, 298 K (\* = residual solvent)

## 6. Activation studies of complex $[\text{Rh}\{\kappa^3\text{-}N,N,H\text{-}B(\text{Me})\text{H}(\text{azaindoly})_2\}(\text{COD})]$ (2) to form 2a

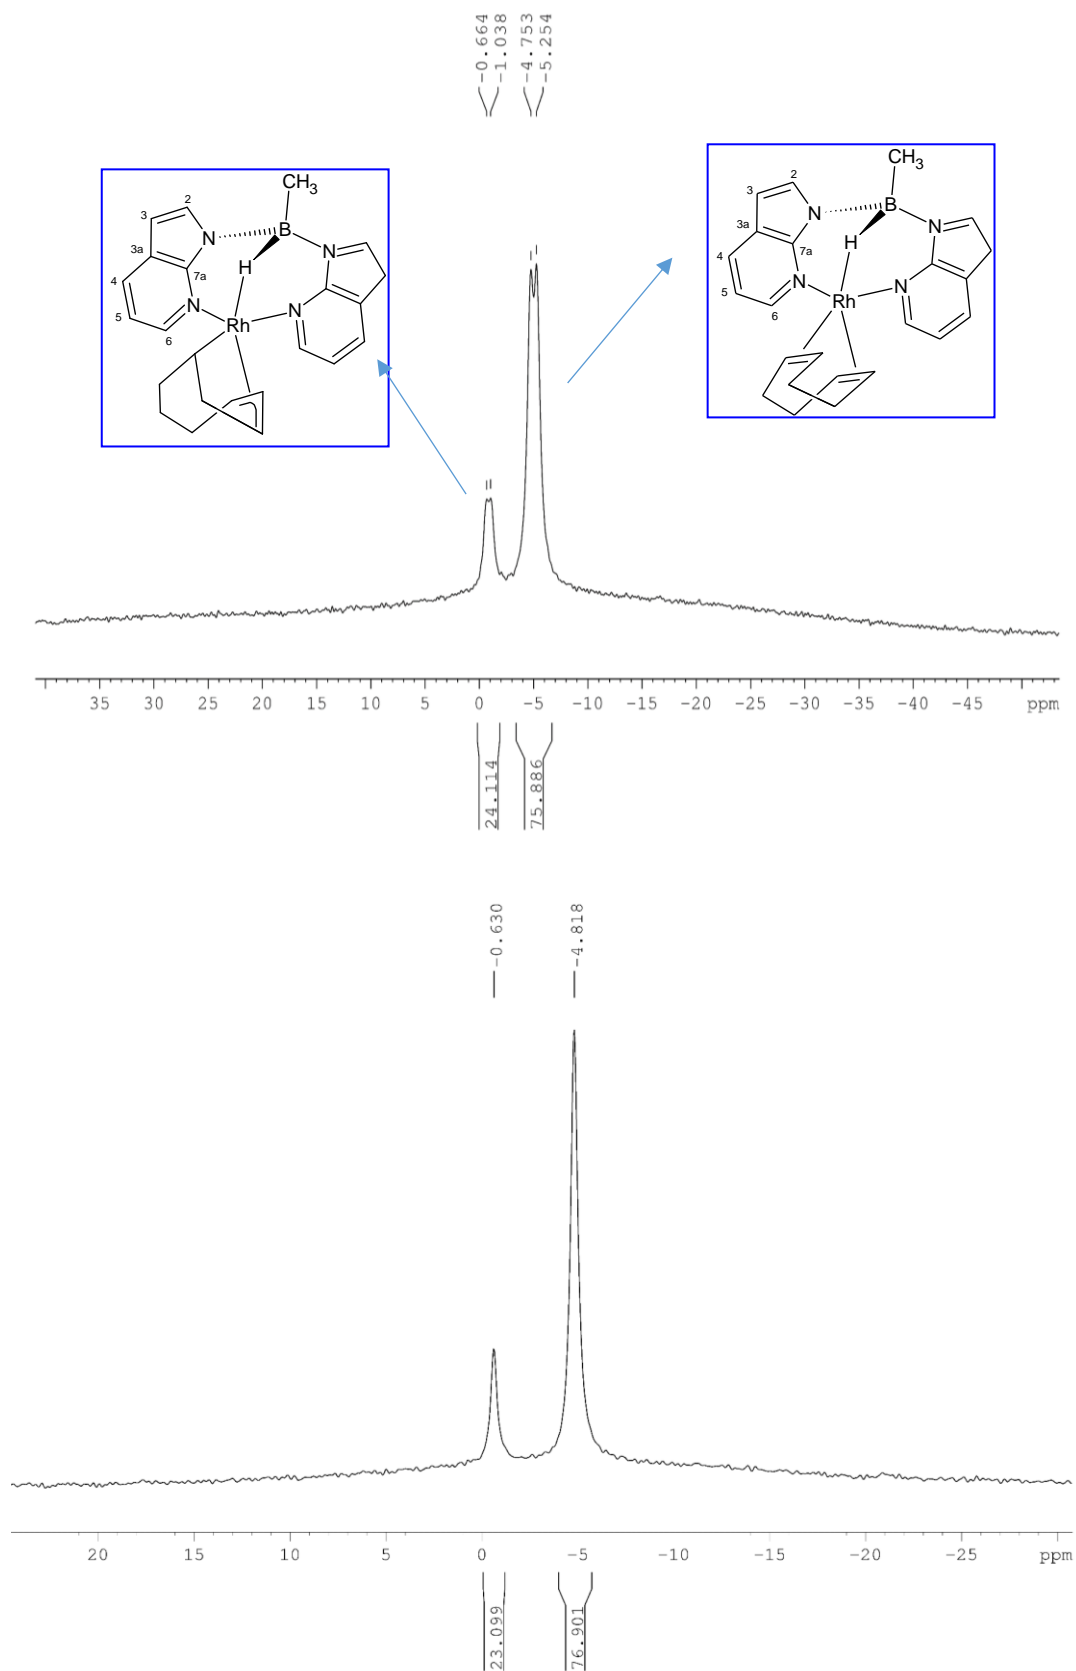

Figure 6.1:  $^{11}\text{B}$  NMR (top) and  $^{11}\text{B}\{^1\text{H}\}$  (bottom) in  $\text{C}_6\text{D}_6$ , 128.37 MHz, 298 K

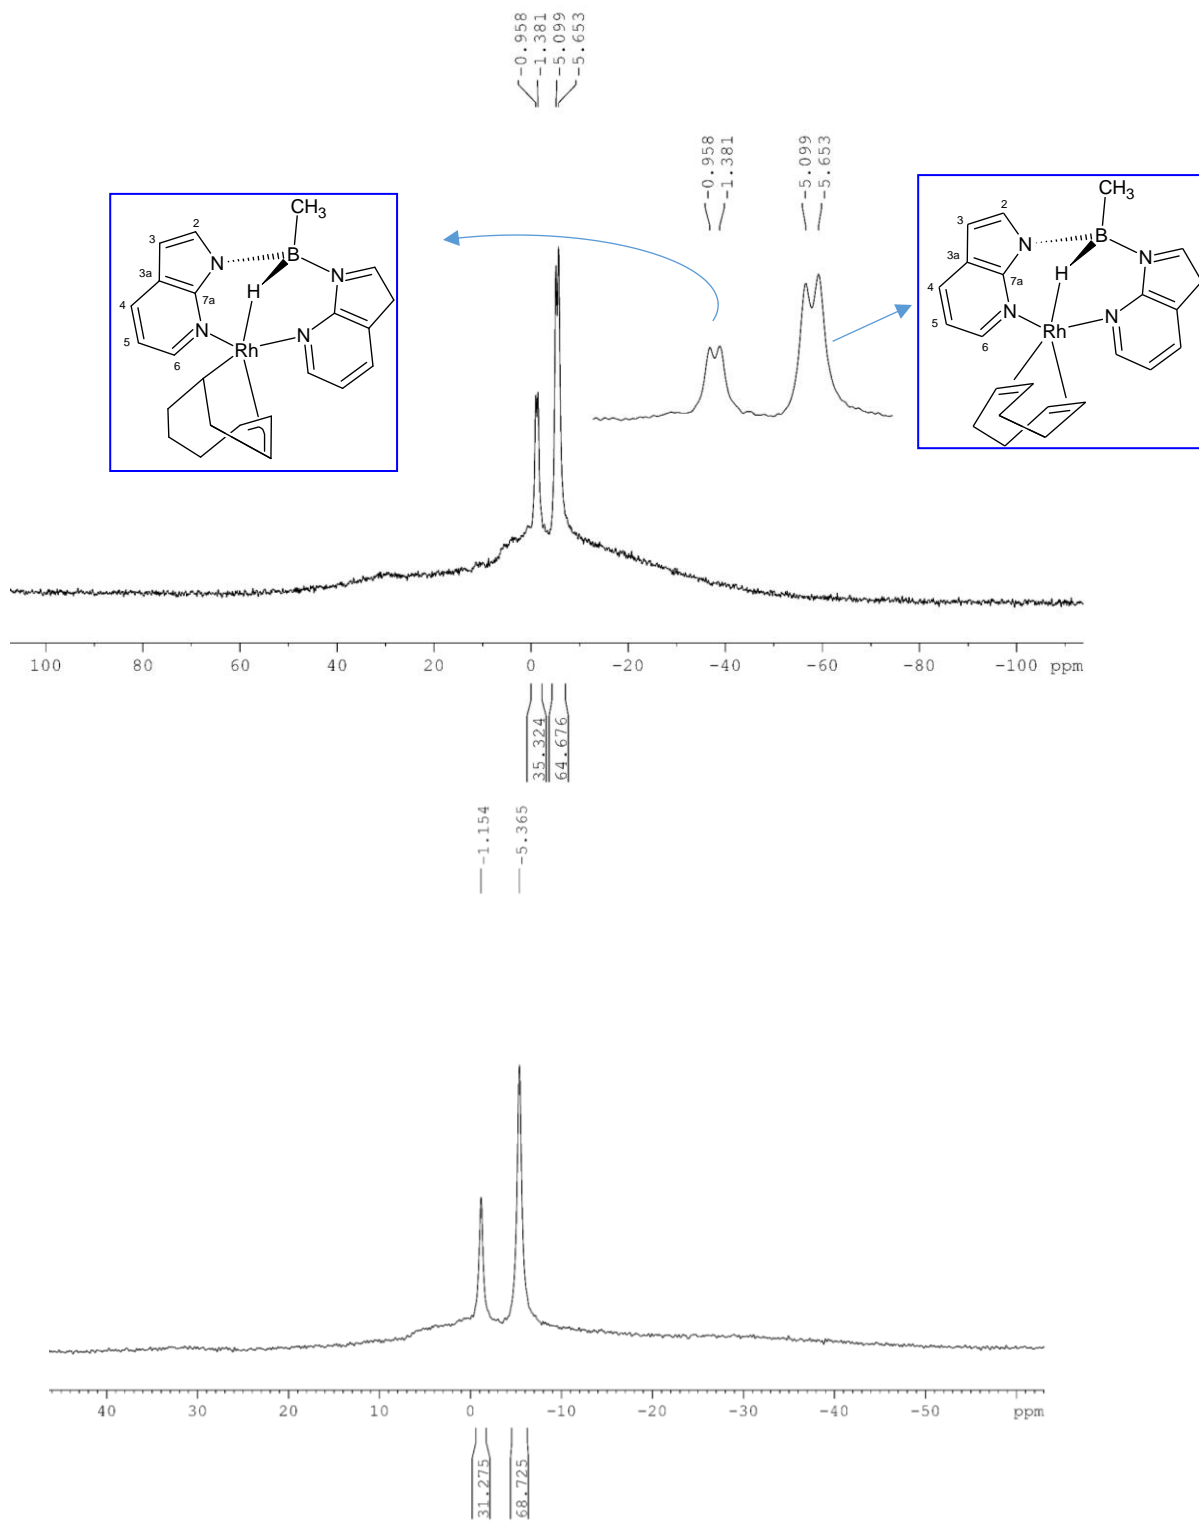

Figure 6.2:  $^{11}\text{B}$  NMR (top) and  $^{11}\text{B}\{^1\text{H}\}$  (bottom) NMR, 128.37 MHz, 298 K in  $\text{DCM-d}_2$

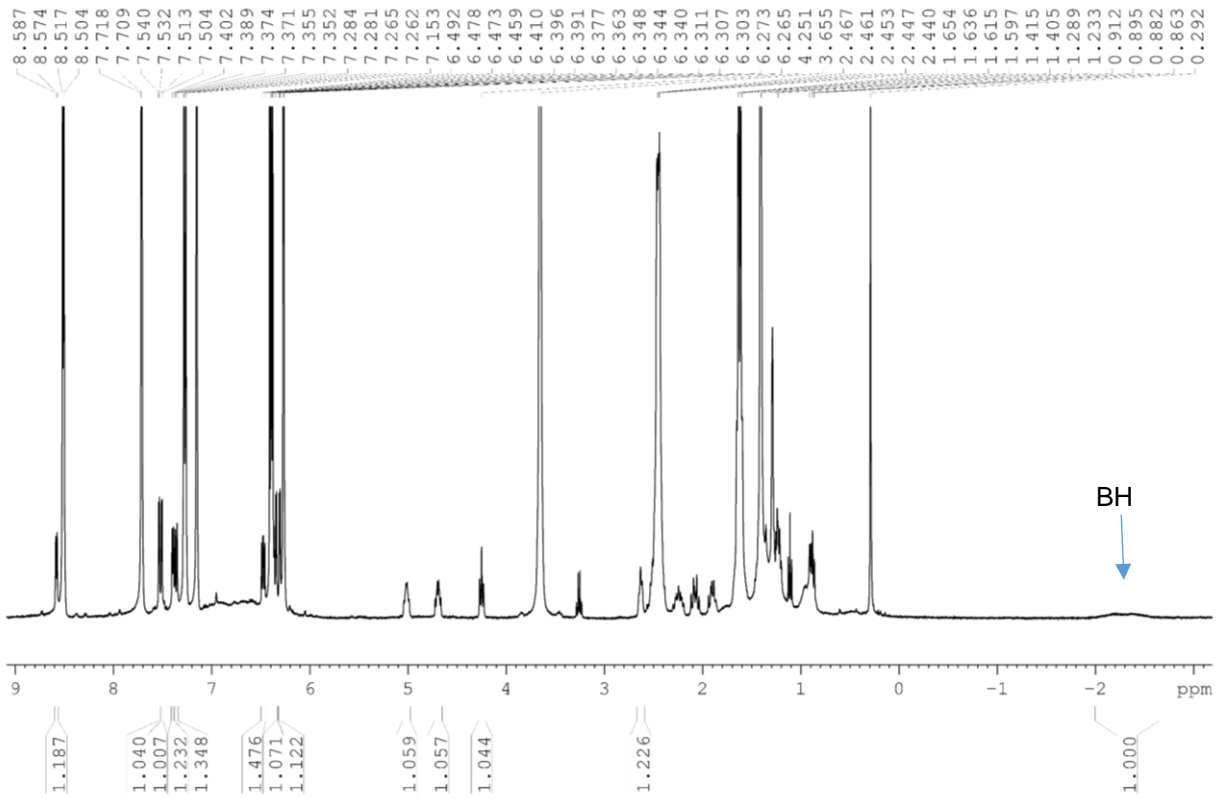

Figure 6.3:  $^1\text{H}$  NMR,  $\text{C}_6\text{D}_6$ , 400.13 MHz, 298 K

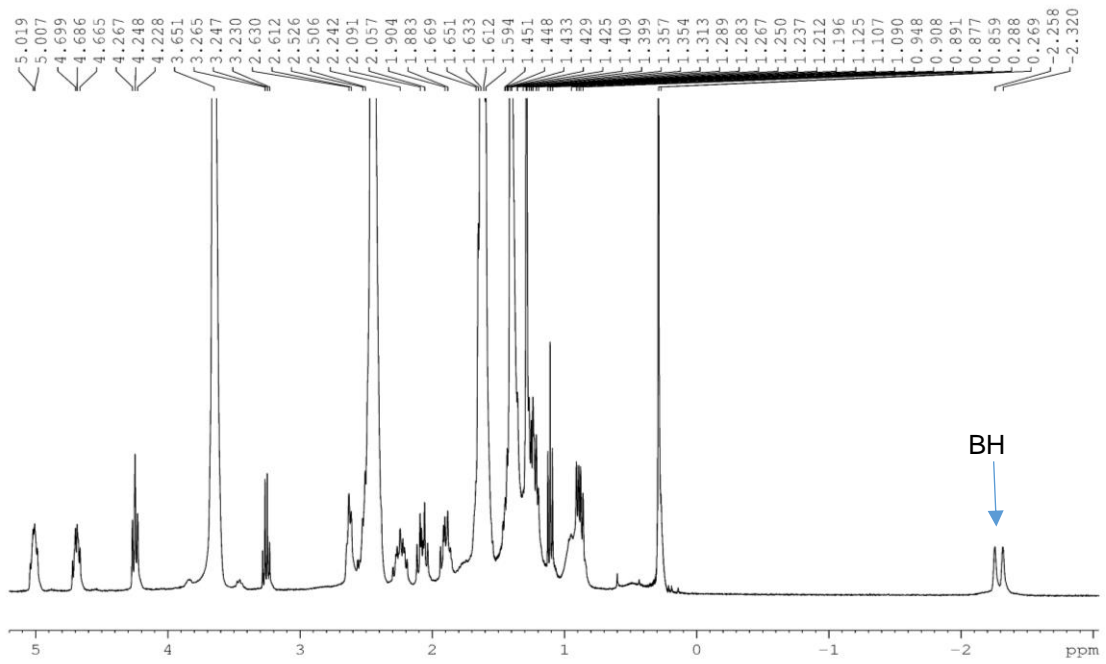

Figure 6.4: Partial  $^1\text{H}\{^{11}\text{B}\}$  NMR,  $\text{C}_6\text{D}_6$ , 400.13 MHz, 298.2 K to 238.2 K



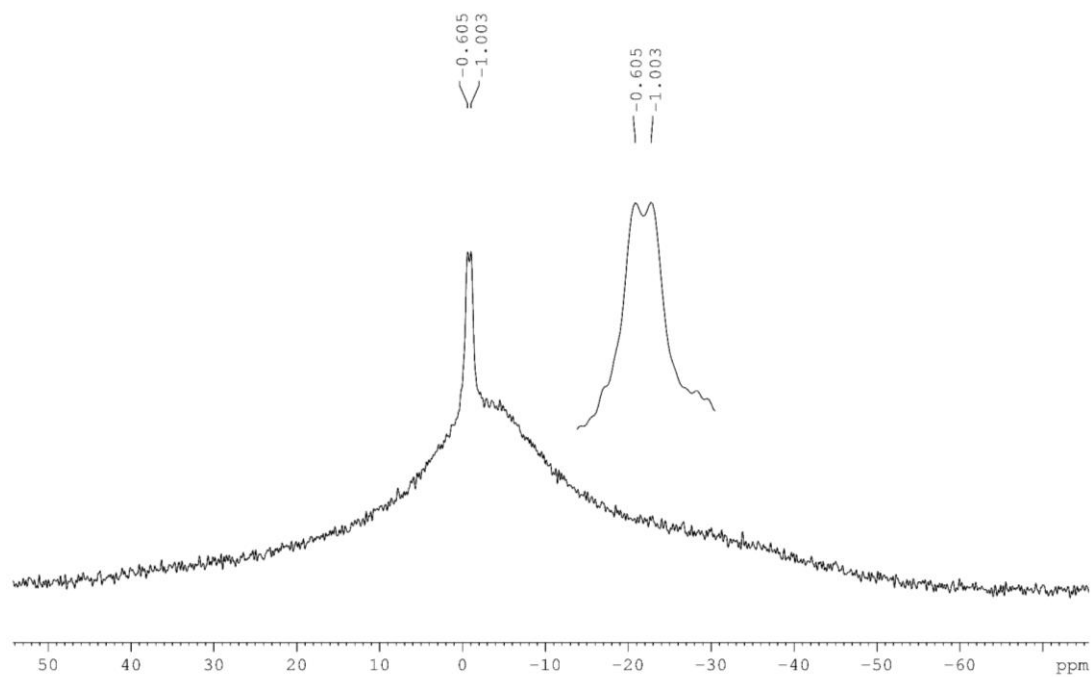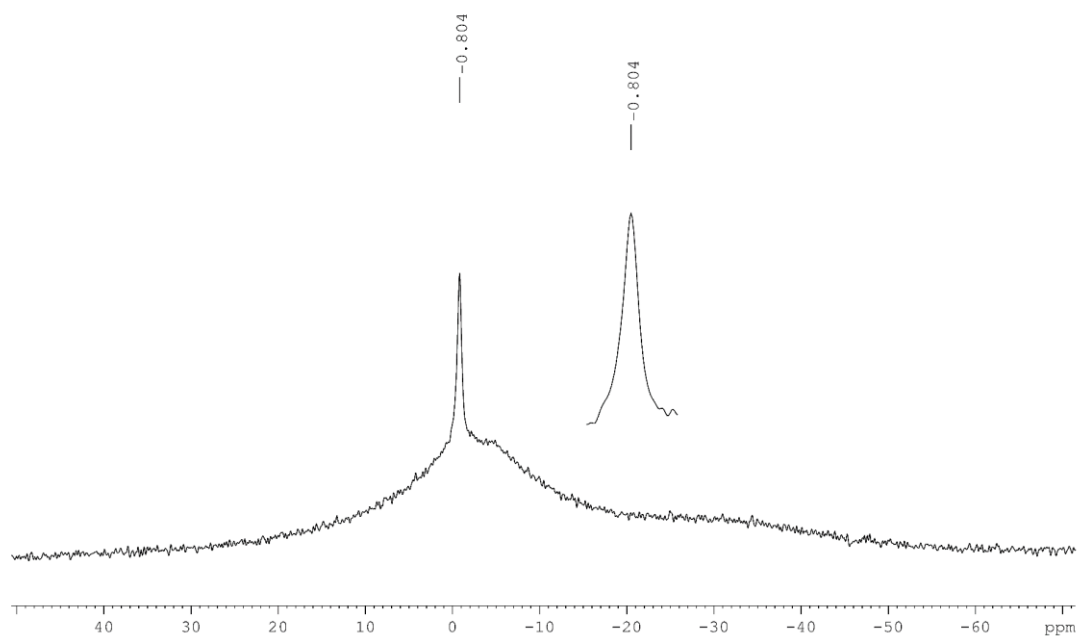

Figure 6.5:  $^{11}\text{B}$  NMR (top) and  $^{11}\text{B}\{^1\text{H}\}$  (bottom) NMR,  $\text{C}_6\text{D}_6$ , 128.37 MHz, 298 K (activated product **2a** – after crystallisation)

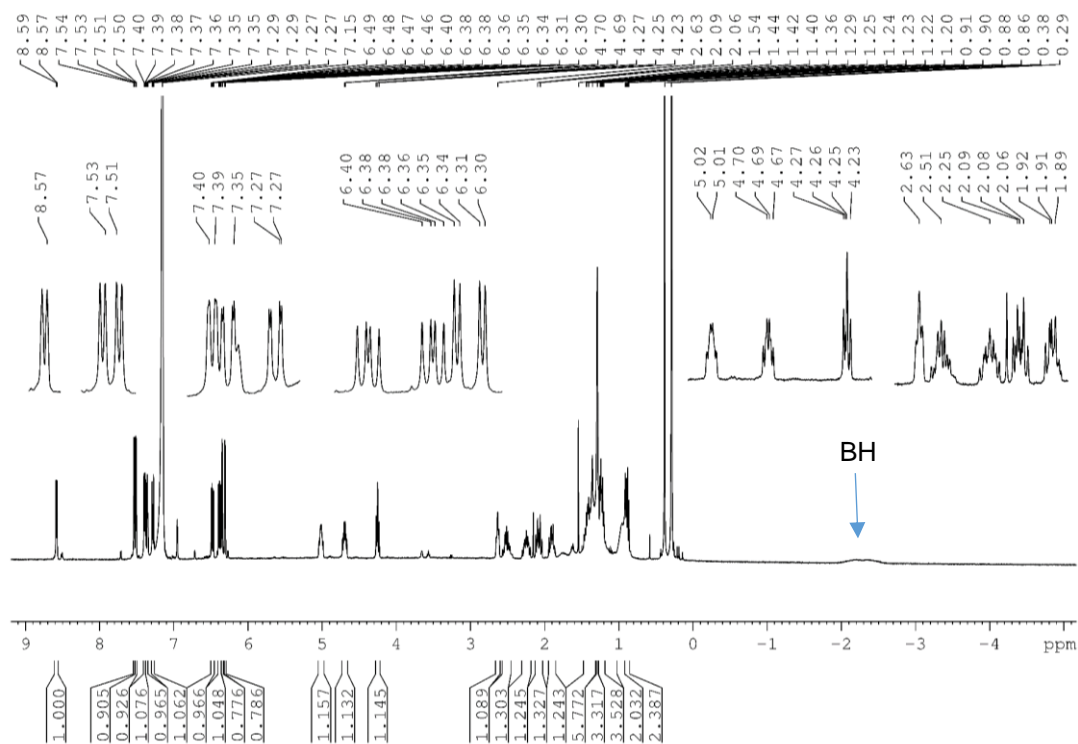

Figure 6.6:  $^1\text{H}$  NMR,  $\text{C}_6\text{D}_6$ , 400.13 MHz, 298 K (activated product **2a** – after crystallisation)

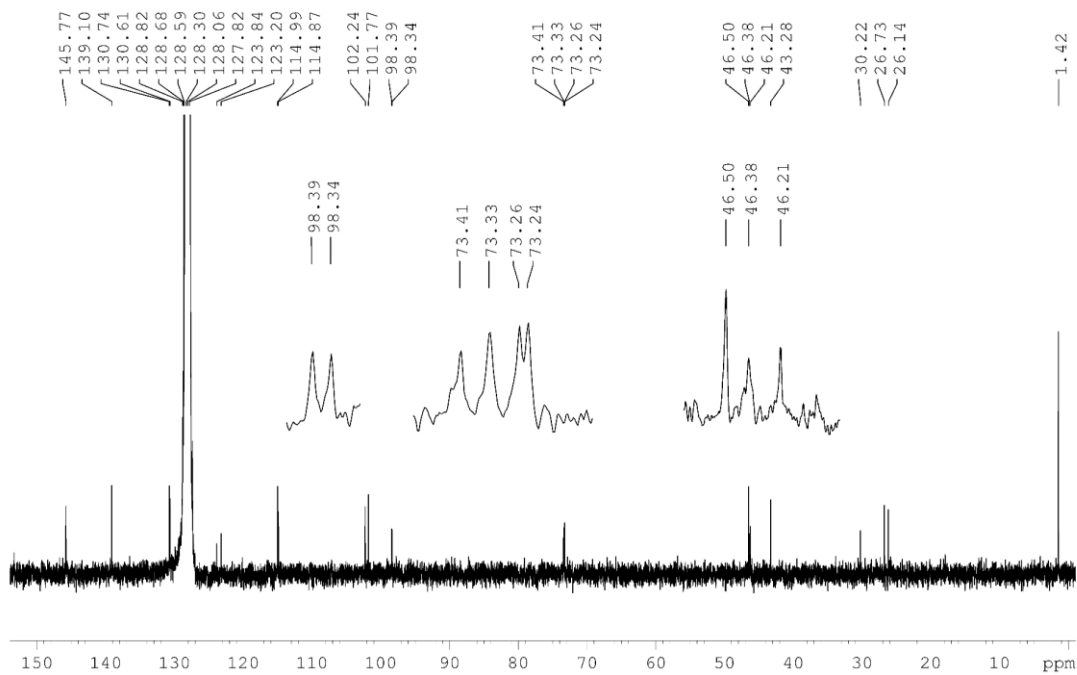

Figure 6.7:  $^{13}\text{C}\{^1\text{H}\}$  NMR ( $\text{C}_6\text{D}_6$ ), 100.62 MHz, 298 K (activated product **2a** - after crystallisation)

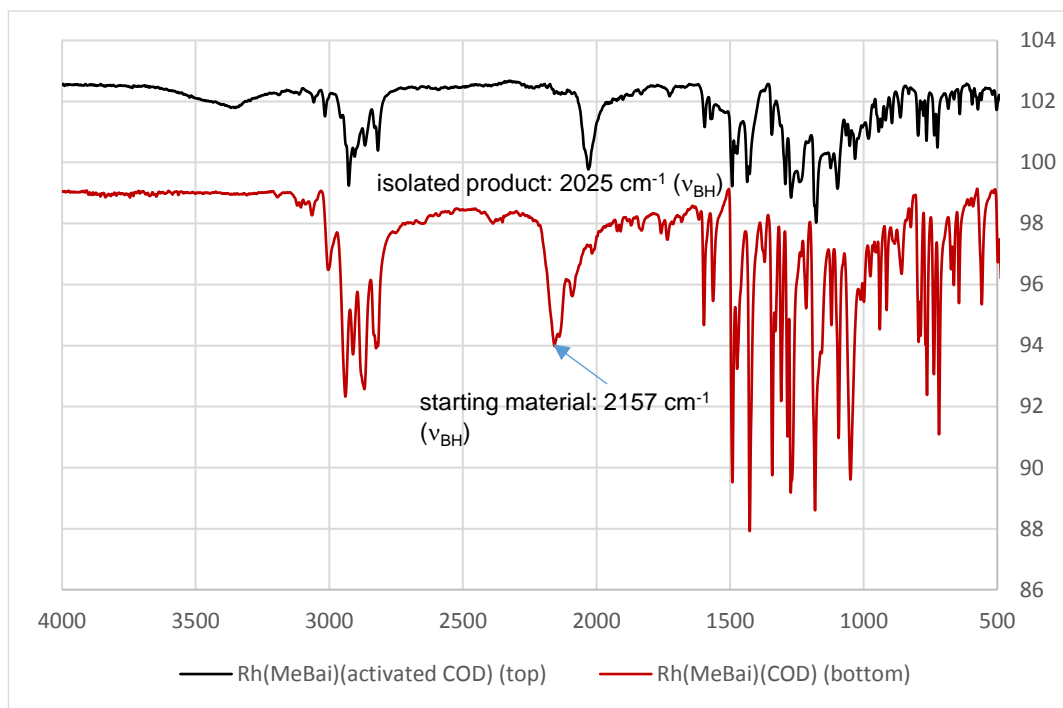

Figure 6.8: Comparison of infrared of starting complex **2** and activated product **2a**
